# Supplementary material for: Study of the Royal Jelly Free Fatty Acids by Liquid Chromatography-High Resolution Mass Spectrometry (LC-HRMS)
Source: PubMed Central journal article supplement (PMC7022826; doi:10.3390/metabo10010040), 2020-01-16
Supplement: metabolites-10-00040-s001.pdf [file metabolites-10-00040-s001.pdf]

# **Study of the Royal Jelly Free Fatty Acids by Liquid Chromatography-High Resolution Mass Spectrometry (LC-HRMS)**

Maroula G. Kokotou, Christiana Mantzourani, Rodalia Babaiti and George Kokotos\*

Department of Chemistry, National and Kapodistrian University of Athens, Athens 15771, Greece

**SUPPLEMENTARY MATERIAL**

| <b>Table of Contents</b>                                                                                                                                                                               | <b>Page</b> |
|--------------------------------------------------------------------------------------------------------------------------------------------------------------------------------------------------------|-------------|
| <b>Figure S1.</b> Full scan spectra of 10-HDA (A), 10-hydroxydecanoic acid (B), 3-hydroxydecanoic acid (C), decanedioic acid (D), 2-dodecenedioic acid (E), decanoic acid (F) and dodecanoic acid (G). | <b>S2</b>   |
| <b>Figure S2.</b> MS/MS spectra of 10-HDA (A), 10-hydroxydecanoic acid (B), 3-hydroxydecanoic acid (C), decanedioic acid (D), 2-dodecenedioic acid (E), decanoic acid (F) and dodecanoic acid (G).     | <b>S3</b>   |
| <b>Figure S3.</b> Isotopic distribution for fragment ions with $m/z$ 141.1286 (A) and $m/z$ 59.0155 (B).                                                                                               | <b>S4</b>   |
| <b>Figure S4.</b> EICs of 3,10-dihydroxydecanoic acid (A), 8-hydroxyoctanoic acid and 3-hydroxyoctanoic acid (B) and 2-decenedioic acid (C).                                                           | <b>S4</b>   |
| <b>Figure S5.</b> Full scan spectra of 3,10-dihydroxydecanoic acid (A), 8-hydroxyoctanoic acid (B), 3-hydroxyoctanoic acid (C) and 2-decenedioic acid (D).                                             | <b>S5</b>   |
| <b>Figure S6.</b> MS/MS spectra of 3,10-dihydroxydecanoic acid (A), 8-hydroxyoctanoic acid (B), 3-hydroxyoctanoic acid (C) and 2-decenedioic acid (D).                                                 | <b>S6</b>   |
| <b>Figure S7.</b> Isotopic distribution for fragment ions with $m/z$ 113.0969 (A) and $m/z$ 59.0143 (B).                                                                                               | <b>S6</b>   |
| <b>Table S1.</b> Precision and accuracy data in spiked RJ samples.                                                                                                                                     | <b>S7</b>   |

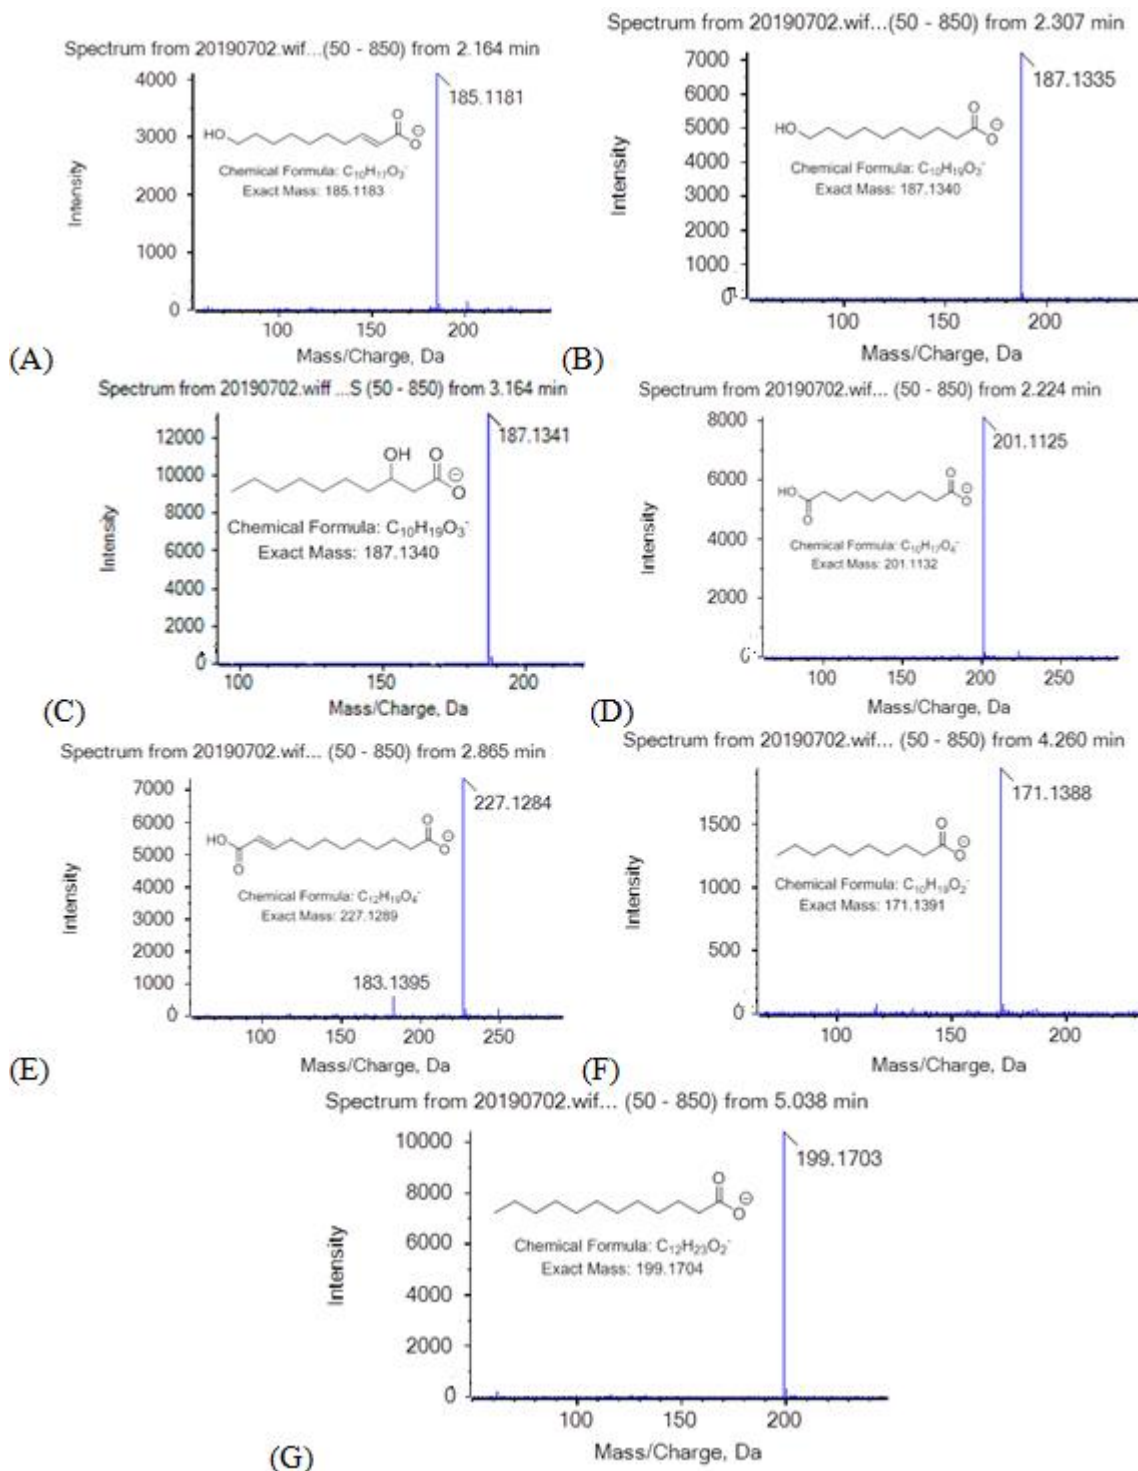

**Figure S1.** Full scan spectra of 10-HDA (A), 10-hydroxydecanoic acid (B), 3-hydroxydecanoic acid (C), decanedioic acid (D), 2-dodecenedioic acid (E), decanoic acid (F) and dodecanoic acid (G).

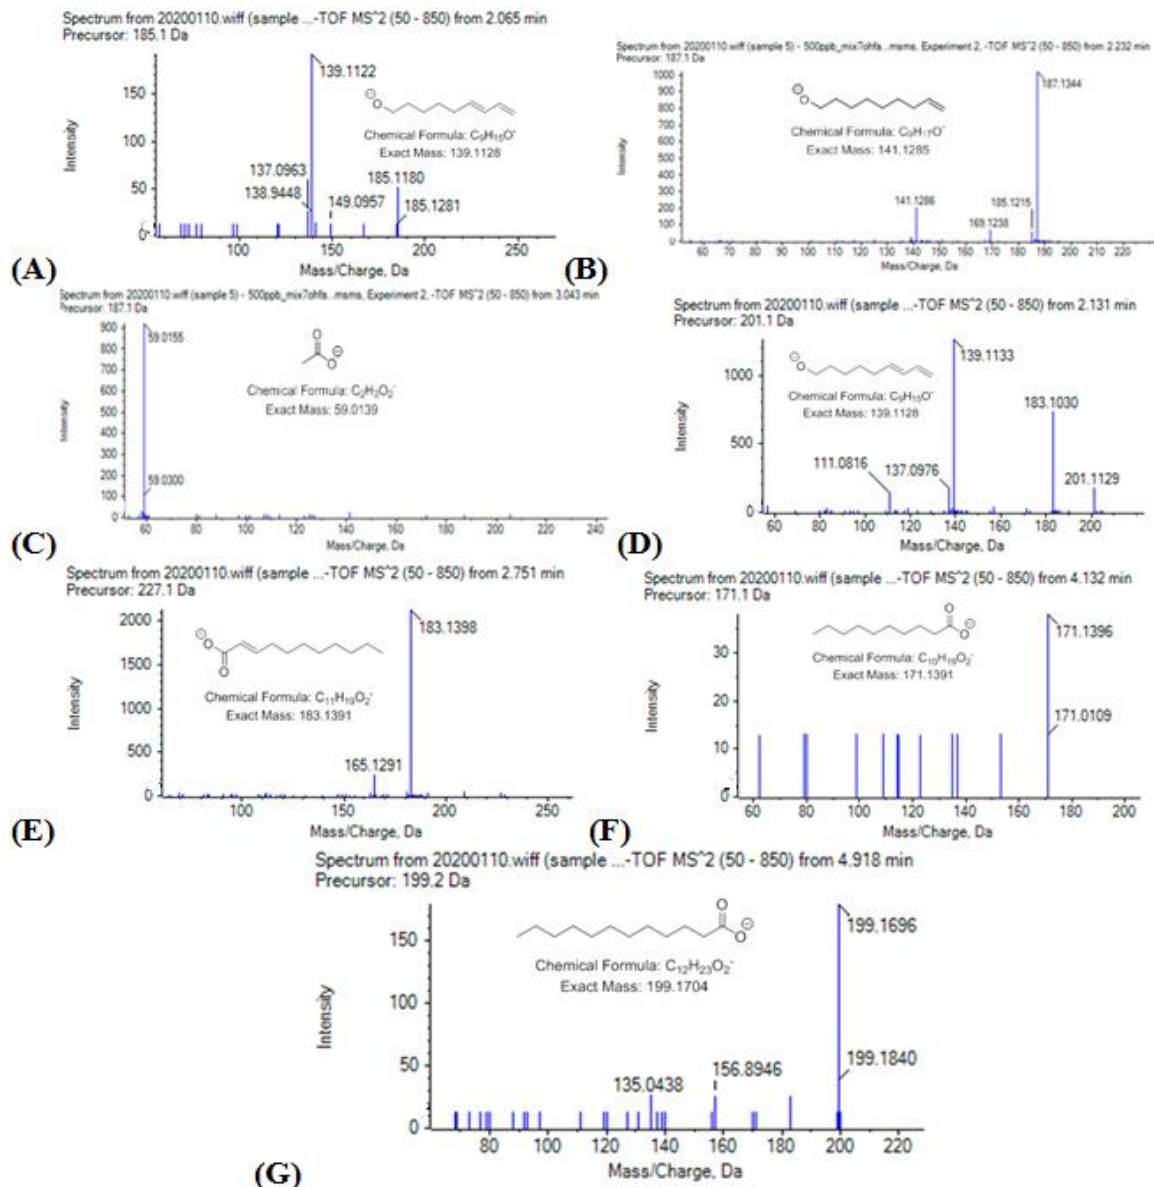

**Figure S2.** MS/MS spectra of 10-HDA (A), 10-hydroxydecanoic acid (B), 3-hydroxydecanoic acid (C), decanedioic acid (D), 2-dodecenedioic acid (E), decanoic acid (F) and dodecanoic acid (G).

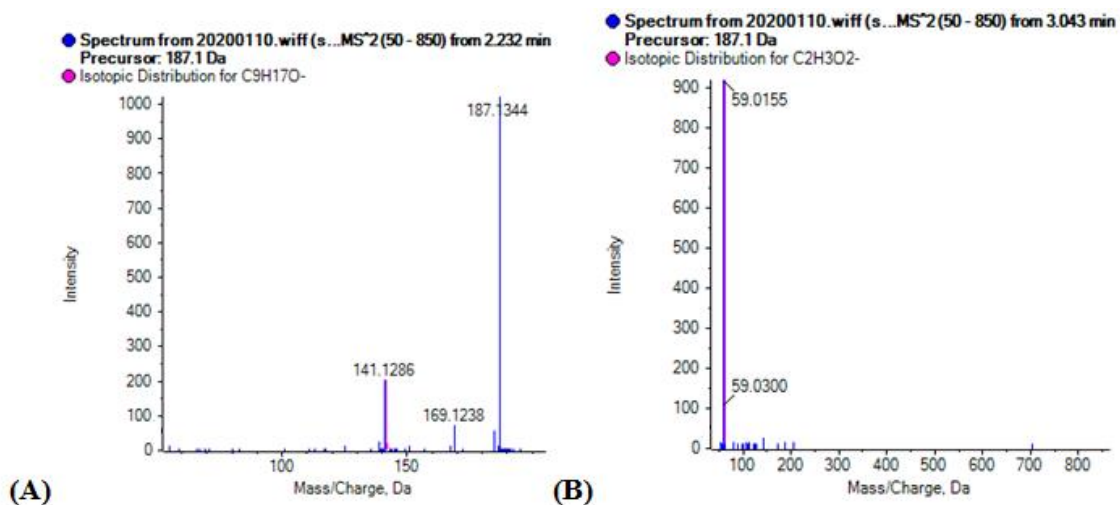

**Figure S3.** Isotopic distribution for fragment ions with  $m/z$  141.1286 (A) and  $m/z$  59.0155 (B).

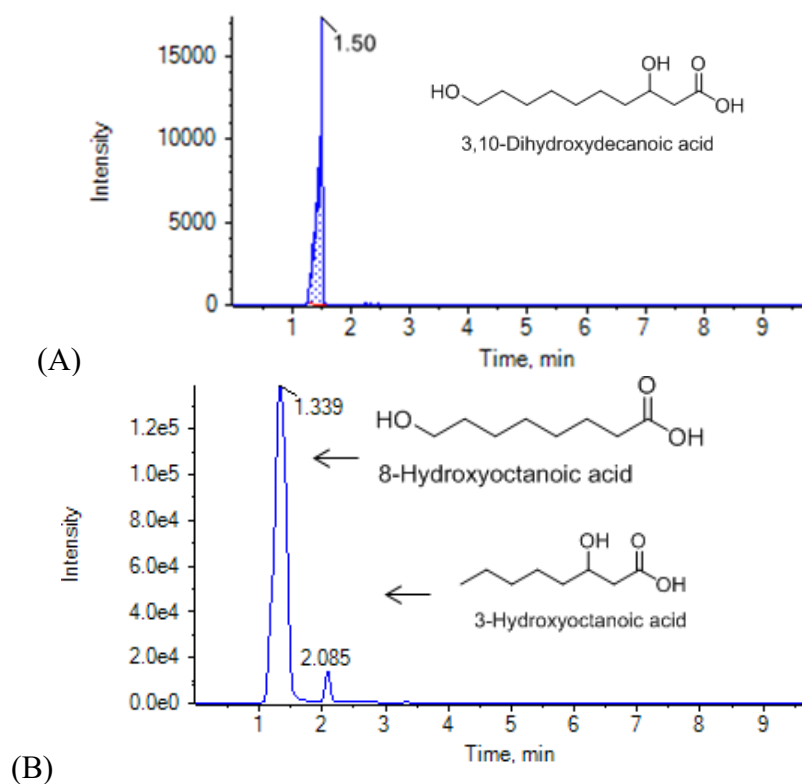

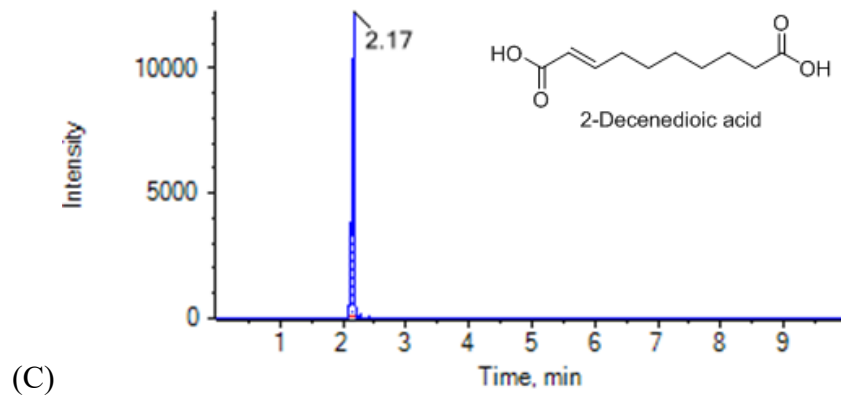

**Figure S4.** EICs of 3,10-dihydroxydecanoic acid (A), 8-hydroxyoctanoic acid and 3-hydroxyoctanoic acid (B) and 2-decenedioic acid (C).

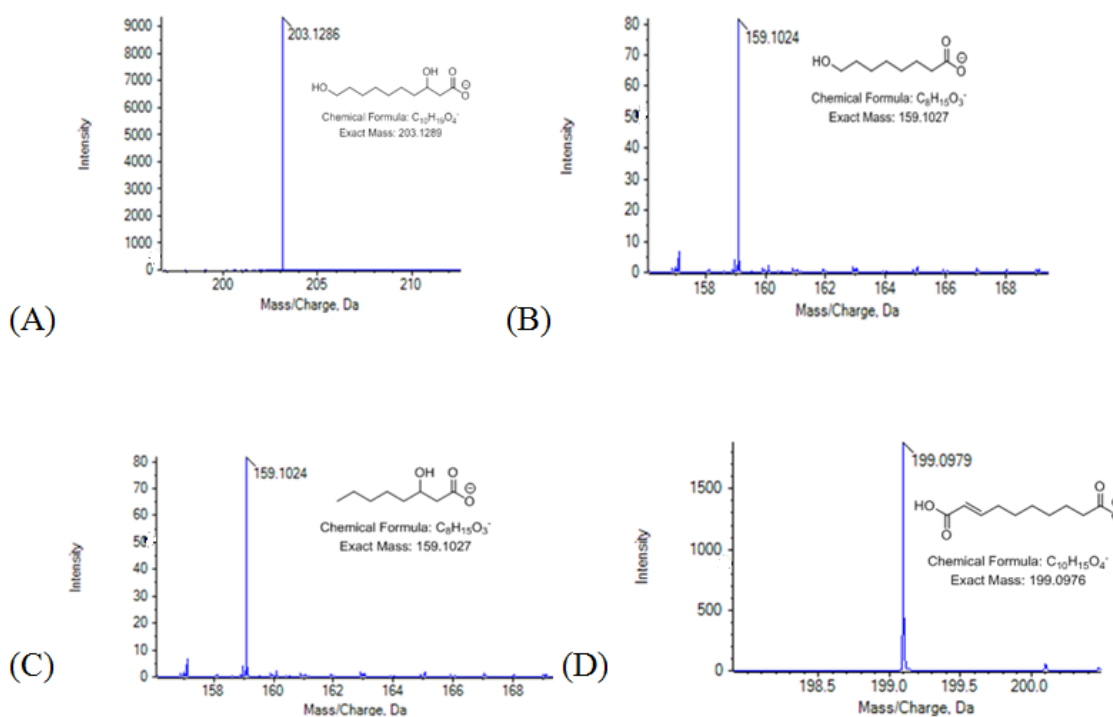

**Figure S5.** Full scan spectra of 3,10-dihydroxydecanoic acid (A), 8-hydroxyoctanoic acid (B), 3-hydroxyoctanoic acid (C) and 2-decenedioic acid (D).

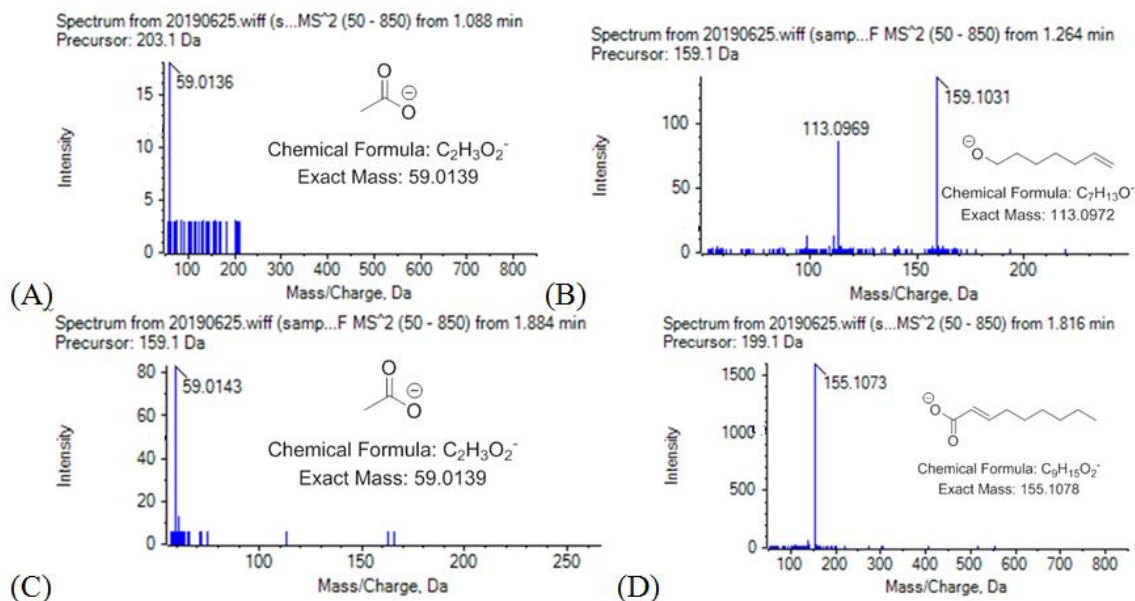

**Figure S6.** MS/MS spectra of 3,10-dihydroxydecanoic acid (A), 8-hydroxyoctanoic acid (B), 3-hydroxyoctanoic acid (C) and 2-decenedioic acid (D).

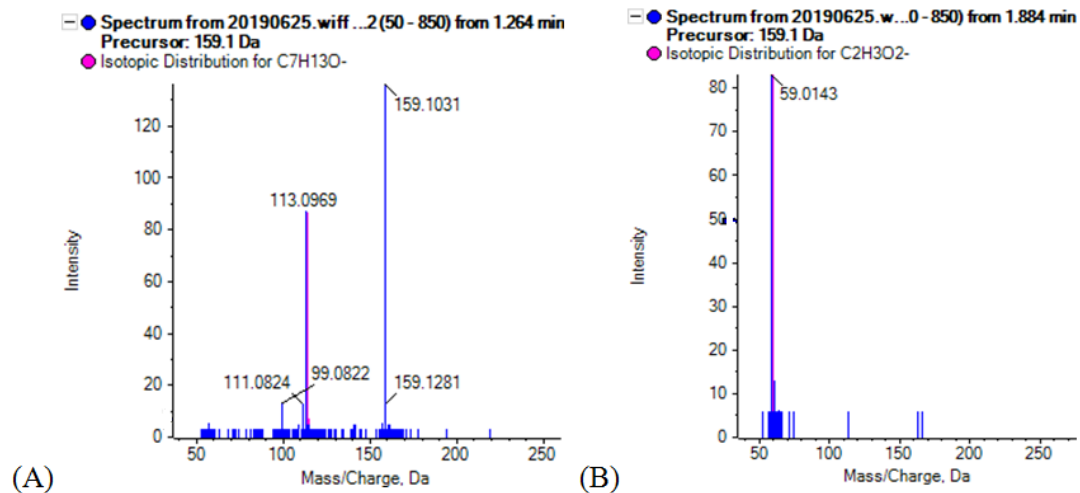

**Figure S7.** Isotopic distribution for fragment ions with  $m/z$  113.0969 (A) and  $m/z$  59.0143 (B).

**Table S1.** Precision and accuracy data in spiked RJ samples.

| Compound                | Protocol A   | Protocol B   |         |               |
|-------------------------|--------------|--------------|---------|---------------|
|                         | Recovery (%) | Recovery (%) | RSD (%) | Matrix Factor |
| 10-HDA                  | 82           | 103          | 13.87   | 0.97          |
| 10-Hydroxydecanoic acid | 113          | 97           | 8.79    | 1.03          |
| 3-Hydroxydecanoic acid  | 81           | 104          | 12.80   | 0.96          |
| Decanedioic acid        | 85           | 98           | 5.63    | 1.02          |
| 2-Dodecenedioic acid    | 82           | 97           | 5.75    | 1.03          |
| Decanoic acid           | -            | 87           | 2.49    | 1.14          |
| Dodecanoic acid         | 107          | 82           | 9.48    | 1.22          |

Protocol A was abandoned, because decanoic acid was not recovered.
